# Supplementary material for: DOR/Tp53inp2 and Tp53inp1 Constitute a Metazoan Gene Family Encoding Dual Regulators of Autophagy and Transcription
Source: PubMed Central journal article supplement (PMC3314686; doi:10.1371/journal.pone.0034034), 2012-03-28
Supplement: pone.0034034.s002.pdf [file pone.0034034.s002.pdf]

DOR Human [Homo sapiens] NP\_067025  
MFQRLSSLFFSTPSPPEPDCPRAFVSEEEVDGWLIIDLPSYAAPSPGGAAPAPAGRP  
PPAPSLMDESFWVTPPACFTAEGPGLGPARLQSSPLEDLLIEHPSMSVYVTGSTIVLEPG  
SPSPLPDAAALPDGDLSEGETLTPARREPRARHAAPLARAALLEKAGQVRRLLQRARQRAE  
RHALSAAVQRQNRARESRPRRSKNQSSFIYQPCQRQFNY

TP53INP1 Human [Homo sapiens] NP\_150601  
MFQRLNKMVFGEVSSSSNQEPFNEKEDEWILVDFIDTCTGFSAAAAEEEEEDISEESPT  
EHPSVFSCLPASLECLADTSDSCFLQFESCPMEESWFITPPPCFTAGGLTTIKVETSPME  
NLLIEHPSMSVYAVHNSCPGLSEATRGTDELHSPSSPRVEAQNEMGQHIHCYVAALAAHT  
TFLEQPKSFRPSQWIKHESERQPLNRRSLRRQNLTRDCHPRQVKHNGWVVHQPCCRQYNY

DOR Opossum [Monodelphis domestica] XP\_001371459  
MFQRLTSLFFSTSPPEEPPSPKAFICPEDEEEVDGWLIIDLPSFAAPSPKASPCLL  
DESWFVTPPACFTAEGPELGAHLESSPLEDLLIEHPSMSVYVTGSTIVLEPGPGPTLTP  
PRSPPPARAGHREVMQPRRDGPRHHTASMPSTRALLEKASQARWVQRRARQADRQLSP  
KVVQRQNRVRRERHRRSKHGQSFHLHQPCQRQFNY

TP53INP1 Opossum [Monodelphis domestica] XP\_001368955  
MFQRLNSMFVGEIKNSSSKEPEFSEKEDDEWILVDFIDTNFSTEVEEEDVSEESPTNHPP  
VFSCLPASLECLADTSESCFVQFEACPMEEESWFITPPPCFTAGGLTTIKVETSPLENLLI  
EHPSMSVYNSSRNLEAGCETDEFHNPSSPRLEVQNEMGQHVHCYVAALAAHSTFLEQTK  
SFRPTQWIKHESERHSLNRRSLRRQNLTRDCHSRQIKHNGWVVHQPCCRQYNY

DOR Lizard [Anolis carolinensis] Genomic profiling  
MFQRLTSLFFSDSAPEDLEEPKPFISKEEEEDDWLIIDITGKEDSVASCCHHGLPPT  
SSLPLSPSDCISRSMPSQDPCLMDESFWVTPPPCFTAECSDPVSMEENPMEDLLIEHPS  
MSVYVTSSTIVVETQTPPEHINRDGEEPERRLQRHAPHHSTSLATKAAILEKVSQVHRIQ  
RAKQLAEKHNFQKVMQQRNRTRECRPRRAKHQGSFVYQPSQRQYNY

TP53INP1 Lizard [Anolis carolinensis] Genomic profiling  
MFQRLNMMFMEEINNLPSEQEPAFSEKEEEEWIVVDFIDTCNNFSMVEEEDDEEEEEEDN  
CNIHETSSVDHPPVFSHLNLSLECLSDASESCFIQFDSCPMEEESWFITPPPCFTAGGLAT  
LKVETSPLENLLIEHPSMSVYAVHNTTHSLNKTSCGDEEEEEDEEKENRNATNPQSEA  
QSOMGQHIRCYIATLATHSTFLEQTKNLRPSQWTKHHERQYLTRNCLRRQNLTRDCYSR  
QLKNNGILLVHQPCQRQYNY

DOR Chicken [Gallus gallus] CN231263, XP\_001232258 and  
genomic profiling  
MFQRLTSLFFSDSAPEDLEEPKPFVSEEEEDGWLIIEELGAHTGSSTPTLPSCLMDES  
WFVTPPPCFTAEGEPDGVGSSPMEDLLIEHPSMSVYVTSTLELDAEGPQDDAVGEVPEP  
RLERHVPHRASASLVKAAVLEKVSQARRVQRAKQLAEKPWLSQKALQRQDRARQPPRA  
RQRAGSFLHQPCQRHCNY

TP53INP1 Chicken [Gallus gallus] NP\_001026117  
MFQRLNMMFMGEIDGLSSQEPFSEKEDDEWILVDFIADTCTNCTEQDDIAETSPAGSS  
PVFTCLPSPLEHLPEAGESCFIQFESCPMEESWFITPPPCFTAGGLTAIKVETSPMENLL  
IEHPSMSVYAVHNACHSLSDTGCDEEFCGPGSPREARNETGQRVHCFVAALPTRSSVL  
EKNKSRFRPTHWIKHEGERHYPSRNLRRQNLTRDCHSRHIKHNGLHVHQPCQRQFNY

DOR Frog [Xenopus tropicalis] multiple ESTs short and long  
MFQRLTRLFFSDVPSNTNEPKPIISEEEDGWLIIDIPESYDLNSSGDEVAQEEDDAT  
PSPLPHSLADRIGWTP53INP1PHPPQSMDESFWVTPPPCFTAEGPQDELGTSPLEDLL  
IEHPSMSVYITNGSIVVEEDTREAPRDRSPSKTRVERRTPHHATSMASAKAAILGKVGQAS  
RIQRAKAHVDRRKISRKSLQRQNLAREIQGRSMTRHRSFLCQPRQRQYNY

TP53INP1 Frog [Xenopus tropicalis] ensemble  
ENSXETP0000014600 and ESTs  
MFQMLNMMFARECSNALSQETKLEKEDEWILVDFIAQVDPGSRVSEEAATFEVISHSD  
ETSVLPHVSNTFERLGTTSDFIHFNLCPMEESWFVTPPPCFTAGELTSMVKTSPMEN  
LLIEHPSMSVYAVHNMCHKPETSCEGFPSPDRTELATENKKKGKHIHCSIAALAARMKG  
LENTKIYLGDKLTKLHLEKHPSRKGFRRQNLIRGCRSQTKHSRLLVHQPSRQYNY

DOR Medaca [*Oryzias latipes*] BJ721597 genomic profiling  
MFQRLSNLLFGEVEEVAELKGNPCLTEADEEGWMLVNLDPGSECGNGGRSREGSER  
GCMDESWFVTPPPCFTAEGATAEASPMEDLLIEHPSMSVYVSPNNTSMVSTSDLVSVGEE  
CILSLASSVSRVSEPGVIPAARSTMPTRVTRGGAAHPGALAKVTQVARVQRCKARIDRR  
HLSRNHIQRQNRTRREQVPCAAHARNTFLHQPSKRNFC

TP53INP1 Medaca [*Oryzias latipes*] genomic profiling and ESTS  
(AM335308;AM316165; AM322529; AM306335)  
MFQVFASALFRDGVVEELSQCSPGDDKREEEDEDEDWILVNYLTDACSGDCGDLRSRML  
SPEDEDEEEDLVMIPIASPAIRYPSCTSLNSVADTDPDGGVDEDEYVDDEEGGFLRLD  
ACSLSESWFVTPPPCFTGRGSQPVLLETSPLENLLIEHPSMSVYAHHSPPRLMLNPLPQH  
SLEGLKDLFLSSGSPDRKPSRGKEKVRCSIEGSRHRQDVAAAQRPNLHSPCYAATLSPNA  
GFLQQQRRPGSAAQRSQPLSRKGLRRRNLRLRPKGTMTMLQQPIQRHLNF

DOR Elephant fish [*Callorhinchus milii*] genomic profiling  
MFHRFTSLFYGGSENTCIEGPDPSLTEKEDDGWLVDFPVEVKASTCVSPHLPDDHLPL  
ASSLSLESLCHCGISSRPPRSKACTLEESWFVTPPPCFTAEGQEPGEVEISPLENLLIEHP  
SMSVYAGSNTNISTMEDEPSEVPSSRSARQPRAERLTAPSPAAGIQSSLVEKVSQVRR  
LQRAKQRMERHQLSRNRIQRQNLTRCRLHRTKHHGSFVYQPRQRHCNY

TP53INP1 Elephant fish [*Callorhinchus milii*] genomic  
profiling  
MYQRFSSMLFGEIDGAERESQELEISEKEDEEWLVLDYIDGMDRATSPNSAMFSSSTSSL  
ELGNSSDPFCFLQLDSCALEESWFITPPPCFTAGGQAPVQVEMSPMENLLIEHPSMSVYT  
VNIHSSLRENSRVIPIVQYVPRRVSAFRIRDSVLEHTNHIHFMQCAKLYVERKRLSCNH  
LRRQNRARKRYFAKEKHFHFKQPCQRNHKY

DOR Sea squirt [*Ciona intestinalis*] XP\_002130814  
MLNTIAYWAGFGSNDTPVDDNLSFITKETGDWTLVDLENQNDQAQSNYTPPPSPRIEHS  
WLITPPPCFTAESMHVVGALNARENLLIEHPSMFVKPAEPSEEPKNTESRSVQRHKGAP  
TSLRRSHRRASRQASCVISQMHRSNQIKRDVARSNKAMQMRQIVHQPRKRC

DOR Lancelet [*Branchiostoma floridae*] CF918976; BW697867;  
CF9189763; BW698074;  
MFSAVTNLLFGASEEVEGACDLRTSTLDDDWLVVELPAGMNIQQMEKETEALQSRPGDRP  
STSSSPVPIPENHPVEESWFVTPPPCFTAGGQSPVAMETNPMENLLIEHPSMSVYVQQR  
SRNSSGETTESDSSGQHQQRRDQVHRPPQRAAAIAARVIVEQAKMKRHAQRVQERHE  
KKANSKTNLQRANLTSRPIRASRHNRRNGLMCKQPQGRVNGKRC

DOR Sea urchin [*Strongylocentrotus purpuratus*] XP\_001177555  
NCBI predicted plus genomic profiling and multiple ESTs  
MLSGLSLDYLFSSNNQAGDAMVTDTPQQRDTPVKDPVKEIEMDGDWLVLDVTDNSGSPS  
PLRSPTSPSKDGFQSQPVPEKPHRMEESWFITPPPCFTAGGHSPLQLATSPLEDLLI  
EHPSMSVYHHPQRGAPMAHRRQHLPRQKSSRTVPKRTHNLRLVNLAKPPRRAAAIAARV  
IEQSANQVGLQEQRDTRKHQQRQYSPGKIERHNKAYHHQSASSRRHYKQNSSISGRHSGA  
LYKQPR

DOR Fly *Drosophila melanogaster*] NP\_728991  
MLSSLASYLFGSATSISQEANPAQNRTNASNANSSSSPGPTSDPAAGDVIEVTSSTPS  
VAGSSRGAVRASNGKRGKNRGKQRTNQQQRKQPAITKLLTPSGEIVDEDFDEDEWYI  
VEKEDEEDDSLPRSDSEELSVVEVSQPRGGSNNASSPMVTATGTAFNCRRRQGVNSCS  
LYSGPRPQQRNYLQRSRVSRPLSISTLSPPRSVPALGAGDHTLTQSLYVASPSGSDQG  
QDHGQGANVLMEEESWYVTPPPCFTSIGPINMETSPPFENLLIEHPSMSVYHSIRSTQEGTD  
SFVNLDLGVSTEVPPQREPEPEAEPPDQRQALQEQQRAPNARFDSHAAVQLKQQTARQ  
SQKSKNKKEHQQLCRSAIKRANKVRDFQAKANRPRRSEMQHCKLVSGANNRNRKCCY

DOR Sea slug [*Aplysia californica*] genomic profiling  
MFNSVAKYLWGDANEVEQGYMEVSGQADTAGEQLDLAIHQDDDDWLVVGGQPASDIELE  
AASLRCSYNPLTGCSDSVQALQDCTMNLNFDLDSNYSSDGESEGGDGGVSPSPESVFS  
VCSGRSHATYRPSGSSHDPWIVAPPPCFTGSGLGELPTISSPLENLLIEHPSMSVYLSV  
PPSSLPPSHPFHLAHLAGESAPASSEPRDSDGEGDGDALREDRTHQLPVGEQLPAAHR  
AHREGLGRHWGFAAPAQVSPAQAVARLHAAQRVQSGKSNKAVSRQCRRENKVYKGC  
KGNTKRKRSRPSSCKSGRMCQRV

DOR Capitella [Capitella sp ] EY564360 and genomic profiling  
MLSGISSYLFGASSAAEDNLPQPTVDPPEVQDDLERLMTREGEWVLDKAA**R**SPPRSP  
RCFRGSDADVTPNGSSGHSTPVHILHPSLCESWLVTTPSCFT**A**AGSARSDPLENLLIEHP  
SMSVYSLGQRGGRSAGEESEESDVEEEAVRSQRLQASRPHPLAINTAIASRKVTQRSM  
QKAVKKHEQQLARNVMQRNNRVQKHNNSCRPRRSEMMQPSGRSNNRSMHL

DOR Sea anemone [Nematostella vectensis] XP\_001623518  
MFSSLSYIWGQTDQVVPDCPLDVEDSRTEEGWIMVDLGSVVNP**K**DVKKHEKAENAVPD  
SVEESWVYTPPSCF**S**RDNFSGVLESNPEDLLIEHPMSVYGPRRSADASAGPSSRSAS  
QAAEENQELEKKPPRRTVQFQEKLELIAQKRKVEAPQHGTIRPNKKNIKKQNLVQFQHSR  
TRRTKKRDRMVGKHIGVHGKRG

DOR Trichoplax [Trichoplax adherens] genomic profiling  
MLWQSLSSYLWDQSTEDASNHRVNVSLTEEDDWILVVKEN**K**DLEEVSNEDQLVKNRKE  
KESGWLLTPPPCFDGHVME**E**LSVSPFEDLLIEHPMSIYRRIDSSASIRNNLDHDFAAASL  
ANSGDNNTHEQSRSR**S**IELYMDRELNKKSDRFNYIRKARDLNVKRSLTFKANSRS  
YSNSWSRRHCFTNFSYRR

DOR Sponge [Ephydatia muelleri] AM760558  
NLIWGYPAAESREEPTDHITVEAEDWLLVQRSDKAQVCEGGSAPLDHGSQVTSDNESVCS  
DASWVVPAPRFRDSPETTNAGHPLENLLIEHPAMSVYQIQVGSQIVPTADVQLVTTV  
SEQAGQAPNRQRQVALHMDVPPKMPIAATQRVQFKHPKLSRASITRHNATVTKTRVPRM  
RTRMSNSKKAGRRGC

DOR Rainbow trout [Oncorhynchus mykiss] CA358690  
MFQALSSLFFGEVEEVAEIKGNPCVTDADDEGWMLVNLPEGATAETSPMEDLLIEHP  
SMSVYVSPSNLSMISNGNLSIVGEESITSLTGSMRVAEPAATS AVHNTMPTRVTRGAA  
AQAGTLAKVTQVARVQRGKARTERRHLGRNR IQRQNRTRQVPRHAAHARNTYLHQPCQ  
RNICH

DOR Salmon [Salmo salar] BG935547  
MIGKIFAHFLGSTDDDFPTDDNETYEELIEFEEGGWVVINIQENNSLTPPEEDPLENLL  
IEHPMSVYQIRHQTSDEVDADEEDASPRVPVKQHVSWRLAAWGSPLPCNVQLLAIQR  
ARTHMECKELTRSALQRQNLAKVRFSPSDRRFGHFQPCQRLYNY
