# Supplementary material for: DOR/Tp53inp2 and Tp53inp1 Constitute a Metazoan Gene Family Encoding Dual Regulators of Autophagy and Transcription
Source: PubMed Central journal article supplement (PMC3314686; doi:10.1371/journal.pone.0034034), 2012-03-28
Supplement: pone.0034034.s003.pdf [file pone.0034034.s003.pdf]

| 1 | 2  | 3  | 4  | 5  | 6  | 7  | 8  | 9  | 10 | 11 | 12 | 13 | 14 | 15 | 16 | 17 | 18 | 19 | 20 | 21 | 22 | 23 | 24 |           |                          |
|---|----|----|----|----|----|----|----|----|----|----|----|----|----|----|----|----|----|----|----|----|----|----|----|-----------|--------------------------|
|   | 24 | 20 | 20 | 22 | 16 | 20 | 23 | 18 | 22 | 17 | 20 | 21 | 24 | 19 | 20 | 16 | 18 | 20 | 23 | 19 | 11 | 20 | 14 | <b>1</b>  | DOR T. adhaerens         |
|   |    | 20 | 31 | 20 | 20 | 24 | 20 | 17 | 22 | 23 | 20 | 17 | 22 | 21 | 18 | 26 | 25 | 25 | 22 | 21 | 24 | 25 | 27 | <b>2</b>  | DOR A. californica       |
|   |    |    | 30 | 25 | 18 | 28 | 25 | 21 | 22 | 22 | 22 | 19 | 20 | 20 | 19 | 24 | 22 | 19 | 23 | 21 | 26 | 25 | 25 | <b>3</b>  | DOR N. vectensis         |
|   |    |    |    | 36 | 24 | 28 | 28 | 24 | 33 | 28 | 33 | 28 | 30 | 29 | 31 | 29 | 32 | 28 | 31 | 32 | 24 | 28 | 28 | <b>4</b>  | DOR B. floridae          |
|   |    |    |    |    | 27 | 30 | 27 | 24 | 27 | 19 | 24 | 20 | 21 | 22 | 20 | 24 | 27 | 28 | 29 | 24 | 26 | 23 | 26 | <b>5</b>  | DOR S. purpuratus        |
|   |    |    |    |    |    | 26 | 23 | 23 | 23 | 26 | 25 | 27 | 23 | 28 | 28 | 22 | 29 | 25 | 25 | 25 | 25 | 20 | 20 | <b>6</b>  | DOR C. intestinalis      |
|   |    |    |    |    |    |    | 33 | 20 | 27 | 21 | 18 | 23 | 23 | 24 | 24 | 26 | 25 | 23 | 32 | 28 | 26 | 24 | 26 | <b>7</b>  | DOR Capitella sp.        |
|   |    |    |    |    |    |    |    | 23 | 28 | 24 | 24 | 25 | 21 | 25 | 27 | 25 | 26 | 22 | 33 | 27 | 24 | 26 | 28 | <b>8</b>  | DOR D. melanogaster      |
|   |    |    |    |    |    |    |    |    | 36 | 29 | 28 | 28 | 33 | 32 | 32 | 24 | 31 | 24 | 27 | 27 | 32 | 28 | 27 | <b>9</b>  | TP53INP1 O. latipes      |
|   |    |    |    |    |    |    |    |    |    | 45 | 52 | 55 | 53 | 56 | 56 | 34 | 41 | 31 | 35 | 36 | 36 | 34 | 35 | <b>10</b> | TP53INP1 C. milii        |
|   |    |    |    |    |    |    |    |    |    |    | 50 | 51 | 48 | 51 | 50 | 26 | 34 | 33 | 30 | 34 | 22 | 30 | 27 | <b>11</b> | TP53INP1 X. tropicalis   |
|   |    |    |    |    |    |    |    |    |    |    |    | 64 | 70 | 66 | 66 | 36 | 40 | 32 | 38 | 34 | 37 | 35 | 36 | <b>12</b> | TP53INP1 G. gallus       |
|   |    |    |    |    |    |    |    |    |    |    |    |    | 69 | 68 | 67 | 30 | 38 | 32 | 33 | 36 | 34 | 31 | 30 | <b>13</b> | TP53INP1 A. carolinensis |
|   |    |    |    |    |    |    |    |    |    |    |    |    |    | 78 | 83 | 31 | 39 | 32 | 38 | 35 | 34 | 32 | 31 | <b>14</b> | TP53INP1 M. domestica    |
|   |    |    |    |    |    |    |    |    |    |    |    |    |    |    | 87 | 31 | 38 | 33 | 38 | 33 | 34 | 31 | 30 | <b>15</b> | TP53INP1 M. musculus     |
|   |    |    |    |    |    |    |    |    |    |    |    |    |    |    |    | 33 | 39 | 33 | 37 | 34 | 34 | 32 | 32 | <b>16</b> | TP53INP1 H. sapiens      |
|   |    |    |    |    |    |    |    |    |    |    |    |    |    |    |    |    | 36 | 36 | 38 | 34 | 39 | 36 | 38 | <b>17</b> | DOR O. latipes           |
|   |    |    |    |    |    |    |    |    |    |    |    |    |    |    |    |    |    | 41 | 42 | 48 | 41 | 43 | 41 | <b>18</b> | DOR C. milii             |
|   |    |    |    |    |    |    |    |    |    |    |    |    |    |    |    |    |    |    | 55 | 51 | 46 | 45 | 46 | <b>19</b> | DOR X. tropicalis        |
|   |    |    |    |    |    |    |    |    |    |    |    |    |    |    |    |    |    |    |    | 65 | 57 | 54 | 56 | <b>20</b> | DOR G. gallus            |
|   |    |    |    |    |    |    |    |    |    |    |    |    |    |    |    |    |    |    |    |    | 52 | 52 | 53 | <b>21</b> | DOR A. carolinensis      |
|   |    |    |    |    |    |    |    |    |    |    |    |    |    |    |    |    |    |    |    |    |    | 62 | 67 | <b>22</b> | DOR M. domestica         |
|   |    |    |    |    |    |    |    |    |    |    |    |    |    |    |    |    |    |    |    |    |    |    | 85 | <b>23</b> | DOR M. musculus          |
|   |    |    |    |    |    |    |    |    |    |    |    |    |    |    |    |    |    |    |    |    |    |    |    | <b>24</b> | DOR H. sapiens           |

Supplementary table 2
